# Supplementary material for: FASSEG: A FAce semantic SEGmentation repository for face image analysis
Source: PubMed Central journal article supplement — Data Brief. 2019 Mar 29;24:103881. doi: 10.1016/j.dib.2019.103881 (PMC6454221; doi:10.1016/j.dib.2019.103881), 2019-03-29
Supplement: mmc1.pdf [file mmc1.pdf]

## Conflict of Interest and Authorship Conformation Form

- All authors have participated in (a) conception and design, or analysis and interpretation of the data; (b) drafting the article or revising it critically for important intellectual content; and (c) approval of the final version.
- This manuscript has not been submitted to, nor is under review at, another journal or other publishing venue.
- The authors have no affiliation with any organization with a direct or indirect financial interest in the subject matter discussed in the manuscript

On behalf of all Authors

Sergio Benini

Signature

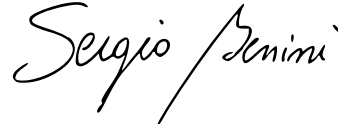A handwritten signature in black ink that reads "Sergio Benini". The signature is written in a cursive style with a large, sweeping initial 'S' and a diagonal slash through the middle of the name.
